# Supplementary material for: Molecular Characterization of Organophosphorus Compounds in Wildfire Smoke Using 21-T Fourier Transform-Ion Cyclotron Resonance Mass Spectrometry
Source: PubMed Central journal article supplement — Anal Chem. 2022 Oct 10;94(42):14537–45. doi: 10.1021/acs.analchem.2c00916 (PMC9610683; doi:10.1021/acs.analchem.2c00916), 2022-10-10
Supplement: ac2c00916_si_001.pdf [file ac2c00916_si_001.pdf]

---

title: "MFAssignR (by Simeon K Schum, Lynn R Mazzoleni, Laura Brown) formula assignment markdown"

author: "This markdown is for iterative formula assignment (with recalibration) to mass lists from -ESI data (Amna Ijaz)"

date: "Thursday, September 03, 2020"

output:

html\_document:

toc: yes

df\_print: kable

---

```
`` {r Package, echo=FALSE, eval=FALSE}
```

```
#library(devtools)
```

```
#setwd("/Users/amnajibaz/Documents/PhD work/Research/R/MFAssignR")
```

```
#devtools::install(pkg = "MFAssignR_Nov 23, 2020")
```

```
##To install an older/newer version of a package available at CRAN
```

```
#install_version("ggplot2", version = "3.3.1", repos = "http://cran.us.r-project.org")
```

```
``
```

```
`` {r Setup, echo=FALSE, message=FALSE, warning=FALSE, include=TRUE,  
paged.print=FALSE}
```

```
library(lemon)
```

```
library(MFAssignR)
```

```

library(dplyr)
library(ggplot2)
library(viridis)
knitr::opts_chunk$set(echo = TRUE, message = FALSE, warning = FALSE, results = FALSE)
knit_print.data.frame <- lemon_print
...

### MFAssignR version: "MFAssignR_Nov 23, 2020"

### Mass list

`` {r Directory and file name, warning=FALSE, message = FALSE, echo=TRUE}
setwd("/Users/amnajibaz/Documents/PhD
work/Research/DOM:NOM_Biomass_PNNL_2020Feb01-08/21-T Data_ESI_Richland BB
Smoke (BB0905)")
Data <- read.csv("BB_200k_mFT_Noise9.csv") %>% arrange(desc(abundance))
file.name <- "BB_200k_mFT_Noise9"
...

# Formula assignment output

### Number of peaks in the raw mass list

`` {r Raw peak count, echo = FALSE, message=FALSE, warning=FALSE, paged.print=FALSE,
results=TRUE, render=lemon_print, fig.width=3}

count(Data)

```

```
...
```

```
## Signal-to-noise estimation
```

```
`` {r SN estimate, echo = TRUE, message=FALSE, warning=FALSE, paged.print=FALSE,  
results= TRUE}
```

```
Noise <- KMDNoise(Data, upper.y = 0.52, lower.y = 0.07, upper.x = NA, lower.x = NA)
```

```
...
```

```
`` {r SN estimate plot, echo = FALSE, message=FALSE, warning=FALSE, results= TRUE,  
fig.width=5.5, fig.height=3}
```

```
plot <- Noise[["KMD"]]
```

```
plot
```

```
KMDN <-Noise[["Noise"]]
```

```
...
```

```
`` {r SN plots, echo = TRUE, message=FALSE, warning=FALSE, paged.print=FALSE, results=  
TRUE, fig.width=9, fig.height=5, include=TRUE}
```

```
SNplot(Data, cut = 1.5*KMDN, mass = 301, window.x = 0.4, window.y = 5)
```

```
SNplot(Data, cut = 2.0*KMDN, mass = 301, window.x = 0.4, window.y = 5)
```

```
...
```

```
`` {r KMDN value, echo = FALSE, message=FALSE, warning=FALSE, results=TRUE,  
render=lemon_print, fig.width=3}
```

```

noise <- as.data.frame(2.0*KMDN)

noise
...

### Number of peaks above the noise threshold

```{r post-noise removal, echo = TRUE, message=FALSE, warning=FALSE,
paged.print=FALSE, results=TRUE, render=lemon_print, include=TRUE}
peaks <- Data %>% filter(abundance > 2.0*KMDN)

count(peaks)
...

```{r SN estimate plot 2, echo = FALSE, message=FALSE, warning=FALSE,
paged.print=FALSE, results= TRUE, fig.width=5.5, fig.height=3}
Noise2 <- KMDNoise(peaks, upper.y = NA, lower.y = NA, upper.x = NA, lower.x = NA)

plot2 <- Noise2[["KMD"]]

plot2

...

## Isotope prescreening

```{r Isotope filtration, echo = TRUE, message=FALSE, warning=FALSE, paged.print=FALSE}
Isotopes <- IsoFiltR(Data, SN = 2.0*KMDN, Carbrat = 60, Sulfrat = 30, Sulferr = 1.2, Carberr =
1.2)
...

```

```

```{r Isotope data frames, echo = FALSE, message=FALSE, warning=FALSE,
paged.print=FALSE}

Mono <- Isotopes[["Mono"]]

Iso <- Isotopes[["Iso"]]

countmono <- count(Mono)

countiso <- count(Iso)

df0 <- data.frame(countmono, countiso) %>% rename(Monoisotopes = n, Polyisotopes = n.1)

```

### Mono and polyisotope count

```{r Monoisotope count, echo = FALSE, message=FALSE, warning=FALSE,
paged.print=FALSE, results=TRUE, render=lemon_print, fig.width=3}

df0

```

## Preliminary CHO assignments

```{r CHO assignments, fig.height=5, fig.width=7, message=FALSE, warning=FALSE,
paged.print=FALSE, echo=TRUE}

Assign <- MFAssignCHO_RMD(Mono, Iso, ionMode = "neg", SN = 2.0*KMDN, ppm_err =
1.2 , H_Cmin = 0.3, H_Cmax = 2.5, O_Cmax = 2.0, DBEOmax = 20, DBEOmin = -13, NMScut
= "on", DeNovo = 1000, highMW = 1200, lowMW = 100)

```

```
...
```

```
``{r preliminary assignment plotting, echo = FALSE, fig.height=3, fig.width=4.5,  
message=FALSE, warning=FALSE, paged.print=TRUE}
```

```
Unambig1.temp <- Assign[["Unambig"]]
```

```
Unambig1 <- Unambig1.temp %>% arrange(desc(abundance)) %>% distinct(formula, .keep_all  
= TRUE)
```

```
Ambig1 <- Assign[["Ambig"]]
```

```
Unassigned1 <- Assign[["None"]]
```

```
MSAssign_CHO <- Assign[["MSAssign"]]
```

```
Error_CHO <- Assign[["Error"]]
```

```
MSgroups_CHO <- Assign[["MSgroups"]]
```

```
VK_CHO <- Assign[["VK"]]
```

```
MSAssign_CHO
```

```
Error_CHO
```

```
MSgroups_CHO
```

```
VK_CHO
```

```
...
```

```
### Number of preliminary CHO assignments
```

```
``{r preliminary unambiguous assignments, echo = FALSE, fig.height=5, fig.width=4,  
message=FALSE, warning=FALSE, paged.print=FALSE, results=TRUE, render=lemon_print}
```

```
countunambig1.temp <- count(Unambig1.temp)
```

```

countunambig1 <- count(Unambig1)
countambig1 <- count(Ambig1)
countunassigned1 <- count(Unassigned1)
...

```{r Preliminary ambiguous assignments, echo = FALSE, fig.height=5, fig.width=4,
message=FALSE, warning=FALSE, paged.print=FALSE, results=TRUE, render=lemon_print}

df <- data.frame(countunambig1.temp, countunambig1, countambig1, countunassigned1) %>%
rename("Preliminary unambiguous CHO MF" = n, "Preliminary unambiguous MF (no
duplicates)" = n.1, "Preliminary ambiguous CHO MF" = n.2, "Preliminary unassigned CHO MF"
= n.3)

df
...

## Mass recalibration

```{r Recalibrant list, echo = FALSE, fig.height=5, fig.width=7, message=FALSE,
warning=FALSE, paged.print=TRUE, include=TRUE, results=FALSE}

RecalList <- RecalList(df = Unambig1)
...

```{r Recalibration, echo = TRUE, message=FALSE, warning=FALSE, paged.print=TRUE,
include=TRUE, results=TRUE, render=lemon_print}

Recalibration <- Recal(Unambig1, peaks = Mono, isopeaks = Iso, mode = "neg", mzRange = 10,
SN = 2.0*KMDN, series1 = "O9_H_8", series2 = "O7_H_6", series3 = "O6_H_7", series4 =
"O9_H_9", series5 = "O7_H_7", series6 = "O10_H_11", series7 = "O5_H_5", series8 =
"O15_H_17", series9 = "O16_H_15", step_O = 3, step_H2 = 5)

```

```
...
```

```
`` {r Recalibration plotting, echo = FALSE, message=FALSE, fig.height=3, fig.width=4.5,  
warning=FALSE, paged.print=TRUE, include=TRUE, results=FALSE}
```

```
Plot_Recalibration <- Recalibration[["Plot"]]
```

```
Plot_Recalibration
```

```
Mono2 <- Recalibration[["Mono"]]
```

```
Iso2 <- Recalibration[["Iso"]]
```

```
List <- Recalibration[["RecalList"]]
```

```
...
```

```
## Final formula assignment (Round 1)
```

```
`` {r Final assignments, message=FALSE, warning=FALSE, paged.print=FALSE, echo=TRUE}
```

```
Assign <- MFAssign_RMD(peaks = Mono2, isopeaks = Iso2, lowMW = 100, highMW = 1200,  
ionMode = "neg", SN = 2.0*KMDN, ppm_err = 0.5, iso_err = 0.5, H_Cmin = 0.3, O_Cmax =  
2.0, H_Cmax = 2.5, DBEOmax = 20, DBEOmin = -13, HetCut = "off", NMScut = "on", DeNovo  
= 1000, SulfCheck = "on", Ambig = "off", MSMS = "off", N3corr = "on")
```

```
...
```

```
`` {r Final assignment plotting, echo = FALSE, fig.height=3, fig.width=4.5, message=FALSE,  
warning=FALSE, paged.print=TRUE}
```

```
Unambig2 <- Assign[["Unambig"]]
```

```
Ambig2 <- Assign[["Ambig"]]
```

```
Unassigned2 <- Assign[["None"]]
```



```
MSAssign_MF <- Assign[["MSAssign"]]
```

```
Error_MF <- Assign[["Error"]]
```

```
MSgroups_MF <- Assign[["MSgroups"]]
```

```
VK_MF <- Assign[["VK"]]
```

```
KMD_MF <- Assign[["KMD"]]
```

```
MSgroupstwo_MF <- Assign[["MSgroupstwo"]]
```

```
DBEO_MF <- Assign[["DBEO"]]
```

```
VK2_MF <- Assign[["VK2"]]
```

```
MSAssign_MF
```

```
Error_MF
```

```
MSgroups_MF
```

```
VK_MF
```

```
...
```

```
## Isotope prescreening and formula assignment (Round 2)
```

```
`` {r Isotope filtration 2, echo = TRUE, message=FALSE, warning=FALSE,  
paged.print=FALSE}
```

```
Isotopes.2 <- IsoFiltR(Unassigned2, SN = 0*KMDN, Carbrat = 60, Sulfrat = 30, Sulferr = 0.5,  
Carberr = 0.5)
```

```
Mono3 <- Isotopes.2[["Mono"]]
```

```
Iso3 <- Isotopes.2[["Iso"]]
```

```
...
```

```
```{r Final assignments b, fig.height=5, fig.width=7, message=FALSE, warning=FALSE,
paged.print=FALSE, echo=TRUE}
```

```
Assign.2 <- MFAssign_RMD(peaks = Mono3, isopeaks = Iso3, lowMW = 100, highMW =
1200, ionMode = "neg", SN = 0*KMDN, ppm_err = 0.5, iso_err = 0.5, H_Cmin = 0.3, O_Cmax
= 2.0, H_Cmax = 2.5, DBEOmax = 20, DBEOmin = -13, HetCut = "off", NMScut = "on",
DeNovo = 350, SulfCheck = "on", Ambig = "off", MSMS = "off", N3corr = "on", Nx = 3, Sx =
1, Px = 1)
```

```
```
```

```
```{r Final assignment plotting b, echo = FALSE, fig.height=3, fig.width=4.5, message=FALSE,
warning=FALSE, paged.print=TRUE}
```

```
Unambig3 <- Assign.2[["Unambig"]]
```

```
Ambig3 <- Assign.2[["Ambig"]]
```

```
Unassigned3 <- Assign.2[["None"]]
```

```
MSAssign_MF <- Assign.2[["MSAssign"]]
```

```
Error_MF <- Assign.2[["Error"]]
```

```
MSgroups_MF <- Assign.2[["MSgroups"]]
```

```
VK_MF <- Assign.2[["VK"]]
```

```
KMD_MF <- Assign.2[["KMD"]]
```

```
MSgroupstwo_MF <- Assign.2[["MSgroupstwo"]]
```

```
DBEO_MF <- Assign.2[["DBEO"]]
```

```
VK2_MF <- Assign.2[["VK2"]]
```

```
MSAssign_MF
```

```
Error_MF
```

```
MSgroups_MF
```

```
VK_MF
```

```
```
```

```
# All final formula assignments
```

```
```{r Final unambiguous assignments, echo = TRUE, fig.height=5, fig.width=4,  
message=FALSE, warning=FALSE, paged.print=FALSE, results=TRUE, render=lemon_print}
```

```
All.unambig.temp <- rbind(Unambig2, Unambig3)
```

```
All.unambig <- All.unambig.temp %>% arrange(desc(abundance)) %>% distinct(formula,  
.keep_all = TRUE)
```

```
All.ambig <- rbind(Ambig2, Ambig3)
```

```
```
```

```
```{r Final unambiguous assignments numbers, echo = FALSE, fig.height=5, fig.width=4,  
message=FALSE, warning=FALSE, paged.print=FALSE, results=TRUE, render=lemon_print}
```

```
countallunambig.temp <- count(All.unambig.temp)
```

```
countallunambig <- count(All.unambig)
```

```
countallambig <- count(All.ambig)
```

```
countallunassigned <- count(Unassigned3)
```

```
C13isotopes <- All.unambig %>% filter(C13_mass != 0)
```

```
countC13 <- count(C13isotopes)
```

```
C13isotopes2 <- All.unambig %>% filter(C13_mass2 != 0)
```

```
countC13two <- count(C13isotopes2)
```

```
S34isotopes <- All.unambig %>% filter(S34_mass != 0)
```

```
countS34 <- count(S34isotopes)
```

```
df2 <- data.frame(countallunambig.temp, countallunambig, countallambig,  
countallunassigned,countC13,countC13two, countS34) %>% rename("Monoisotopic MF  
(duplicates included)" = n, "Final monoisotopic MF (duplicates removed)" = n.1, "Ambiguous  
MF" = n.2, "Masses not assigned an MF" = n.3, "13C isotopologues" = n.4, "13C2  
isotopologues" = n.5, "34S isotopologues" = n.6)
```

```
df2
```

```
All.unambig$group <- factor(All.unambig$group, levels = c("CHO", "CHNO", "CHOS",  
"CHNOS", "CH", "CHN", "CHNS", "CHS", "CHP", "CHNOP", "CHOP", "CHNOSP"))
```

```
Unambigstat <- All.unambig %>% group_by(group) %>% summarize(total = n())
```

```
Unambigstat
```

```
````
```

```
### Final formula assignment spectrum
```

```
````{r Final assignment spectrum, echo = FALSE, fig.height=3, fig.width=5, message=FALSE,  
warning=FALSE, paged.print=TRUE, results=TRUE}
```

```
spectra <-ggplot2::ggplot() +
```

```
ggplot2::geom_segment(data=All.unambig, size=0.5,ggplot2::aes_string(x = "exp_mass", xend =  
"exp_mass", y = 0, yend = "abundance"), alpha = 0.9, color = "green")+
```

```
ggplot2::geom_segment(data=All.unambig, size=0.5,ggplot2::aes_string(x = "C13_mass", xend  
= "C13_mass", y = 0, yend = "C13_abund"), alpha = 0.9, color = "blue")+
```

```
ggplot2::geom_segment(data=All.unambig, size=0.5,ggplot2::aes_string(x = "C13_mass2", xend
= "C13_mass2", y = 0, yend = "C13_abund2"), alpha = 0.9, color = "blue")+
```

```
ggplot2::geom_segment(data=All.unambig, size=0.5,ggplot2::aes_string(x = "S34_mass", xend
= "S34_mass", y = 0, yend = "S34_abund"), alpha = 0.9, color = "blue")+
```

```
ggplot2::geom_segment(data=Unassigned3, size=0.5,ggplot2::aes_string(x = "exp_mass", xend
= "exp_mass", y = 0, yend = "abundance"), alpha = 0.9, color = "red")+
```

```
coord_cartesian(xlim = c(150, 800)) +
```

```
ggplot2::labs(x = "m/z", y = "Abundance", title = "Assignment spectrum (duplicates
removed)")+
```

```
theme_test() +
```

```
theme(axis.text=element_text(size=12,face="bold"),
axis.text.y=element_text(size=12,face="bold", angle = 0,
hjust=0.5,vjust=0.5),legend.title=element_text(face="bold", size = 9), axis.title =
element_text(size=15,face="bold"),plot.title=element_text(size=15,face="bold"),
legend.text=element_text(face="bold",size=12),strip.text=element_text(face="bold",size=12),leg
end.position = "bottom",legend.justification="center",strip.background = element_blank())
```

```
spectra
```

```
...
```

```
#### Unidentified peaks
```

```
```{r Final unassigned, echo = FALSE, fig.height=3, fig.width=5, message=FALSE,
warning=FALSE, paged.print=TRUE, results=TRUE}
```

```
Noise3 <- KMDNoise(Unassigned3, upper.y = NA, lower.y = NA, upper.x = NA, lower.x = NA)
```

```
plot3 <- Noise3[["KMD"]]
```

```
plot3
```

```
...
```

```
# Bulk properties of monoisotopic ions
```

```
```{r, results=TRUE, echo=FALSE, message = FALSE, fig.width=20, render=lemon_print}
```

```
average <- All.unambig %>% summarise(" " = "Average", "O/C" = mean(O_C), "H/C" =  
mean(H_C), "DBE" = mean(DBE), "#C" = mean(C), "#O" = mean(O), "#N" = mean(N), "#S" =  
mean(S), "Absolute error" = mean(AE_ppm), "m/z" = mean(exp_mass))
```

```
sd <- All.unambig %>% summarise(" " = "Standard deviation", "O/C" = sd(O_C), "H/C" =  
sd(H_C), "DBE" = sd(DBE), "#C" = sd(C), "#O" = sd(O), "#N" = sd(N), "#S" = sd(S), "Absolute  
error" = sd(AE_ppm), "m/z" = sd(exp_mass))
```

```
table1 <- bind_rows(average, sd)
```

```
table1
```

```
...
```

```
# Bulk properties by molecular groups from monoisotopic ions
```

```
```{r, results=TRUE, echo=FALSE, message = FALSE, fig.width=20, render=lemon_print}
```

```
average <- All.unambig %>% group_by(group) %>% summarise(" " = "Average", "O/C" =
mean(O_C), "H/C" = mean(H_C), "DBE" = mean(DBE), "#C" = mean(C), "#O" = mean(O),
"#N" = mean(N), "#S" = mean(S), "Absolute error" = mean(AE_ppm), "m/z" =
mean(exp_mass))
```

```
sd <- All.unambig %>% group_by(group) %>% summarise(" " = "Standard deviation", "O/C" =
sd(O_C), "H/C" = sd(H_C), "DBE" = sd(DBE), "#C" = sd(C), "#O" = sd(O), "#N" = sd(N),
"#S" = sd(S), "Absolute error" = sd(AE_ppm), "m/z" = sd(exp_mass))
```

```
table1 <- bind_rows(average, sd) %>% arrange(group)
```

```
table1
```

```
...
```

```
```{r Write files, echo = TRUE, include=FALSE}
```

```
max.abundance <- max(Data$abundance)
```

```
All.unambig <- All.unambig %>% mutate(SNR = abundance/KMDN, n_abundance =
abundance/max.abundance)
```

```
write.csv(All.unambig, paste0("MFOutput/", file.name, "_UMF.csv"), row.names=FALSE,
na="")
```

```
All.ambig <- All.ambig %>% mutate(SNR = abundance/KMDN, n_abundance =
abundance/max.abundance)
```

```
write.csv(All.ambig, paste0("MFOutput/", file.name, "_AMF.csv"), row.names=FALSE, na="")
```

```
Unassigned3 <- Unassigned3 %>% mutate(SNR = abundance/KMDN, n_abundance =
abundance/max.abundance, tag = "Unassigned")

write.csv(Unassigned3, paste0("MFOutput/", file.name, "_NoMF.csv"), row.names=FALSE,
na="")

all <- bind_rows(All.unambig,All.ambig,Unassigned3)

write.csv(all, paste0("MFOutput/", file.name, "_Full.csv"), row.names=FALSE)

'''
```
